# Supplementary material for: Alcohol exposure disrupts mu opioid receptor-mediated long-term depression at insular cortex inputs to dorsolateral striatum
Source: PubMed Central journal article supplement (PMC5882774; doi:10.1038/s41467-018-03683-1), 2018-04-03
Supplement: 41467_2018_3683_MOESM1_ESM.pdf [file 41467_2018_3683_MOESM1_ESM.pdf]

**Title: Alcohol exposure disrupts mu opioid receptor-mediated long-term depression at insular cortex inputs to dorsolateral striatum**

**Munoz et al.**

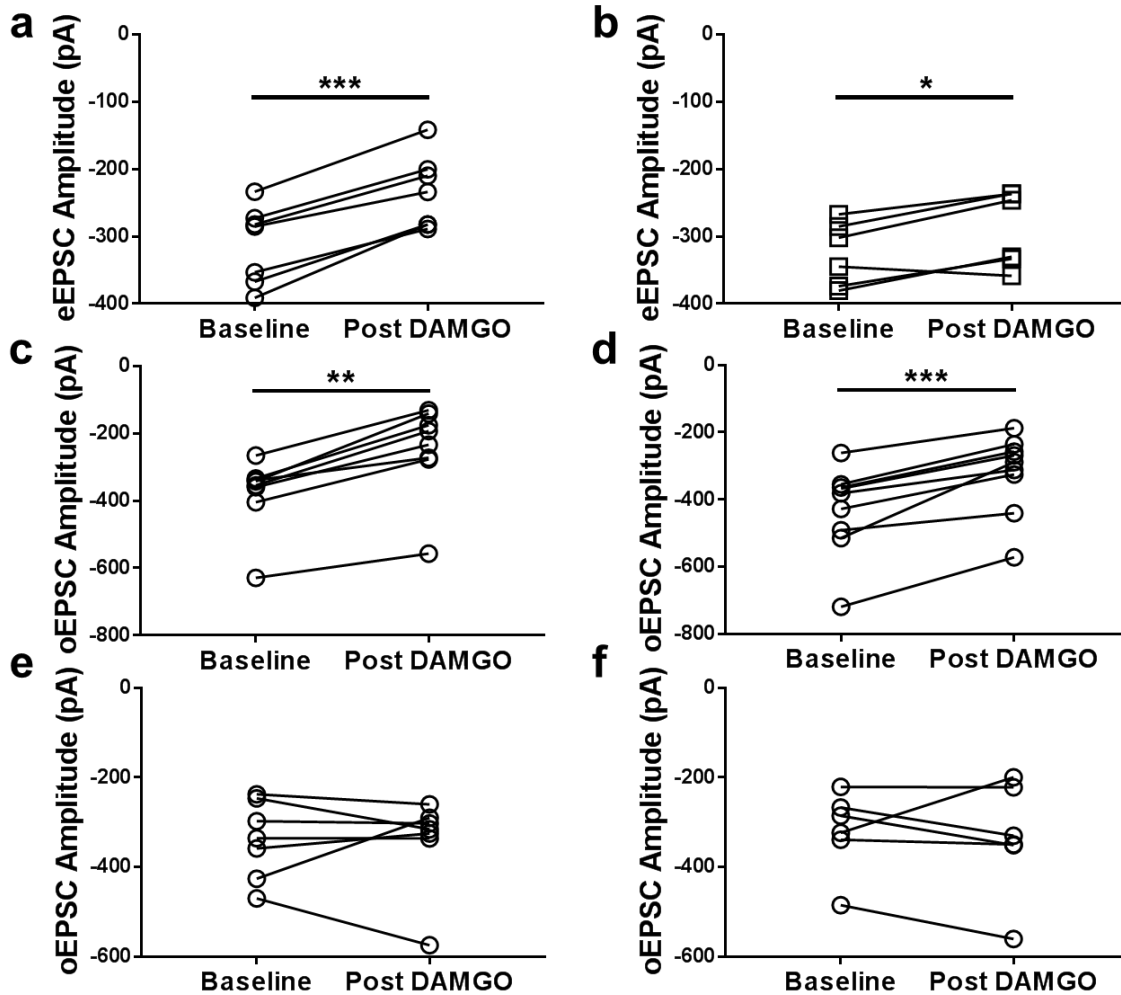

**Supplementary Figure 1. MOR activation by DAMGO leads to a reduction of EPSC amplitude.** **a)** DAMGO application (0.3  $\mu$ M, 5 min) reduced eEPSC amplitude in the DLS, confirming that the activation of MORs leads to mOP-LTD of glutamate release (paired t-test,  $P=0.0001$ ,  $t_6=10.88$ ,  $n=7$  from 2 mice). **b)** Reduction of eEPSC amplitude post-DAMGO application confirmed the presence of mOP-LTD in the DMS (paired t-test,  $P=0.0196$ ,  $t_5=3.386$ ,  $n=6$  from 2 mice). **c)** DAMGO application (0.3  $\mu$ M, 5 min) reduced oEPSC amplitude from cortical inputs in the DLS, confirming that the activation of MORs from cortical synapses leads to mOP-LTD (Wilcoxon matched-pairs signed rank test,  $P=0.0078$ ,  $n=8$  from 7 mice). **d)** Reduction of oEPSC amplitude post-DAMGO application in Ai32-Emx1Cre<sup>+</sup> mice confirmed the presence of mOP-LTD mediated by the activation of cortical inputs in the DMS (paired t-test,  $P=0.0002$ ,  $t_8=3.386$ ,  $n=9$  from 5 mice). **e)** MOR activation from thalamic inputs in Ai32-Vglut2Cre<sup>+</sup> mice does not produce LTD in the DLS (Wilcoxon matched-pairs signed rank test,  $P=0.6875$ ,  $n=7$  from 3 mice). **f)** DAMGO application does not produce LTD in the DMS (paired t-test,  $P=0.64$ ,  $t_5=0.4974$ ,  $n=6$  from 2 mice). \* $P < 0.05$ , \*\* $P < 0.01$ , \*\*\* $P < 0.001$ .

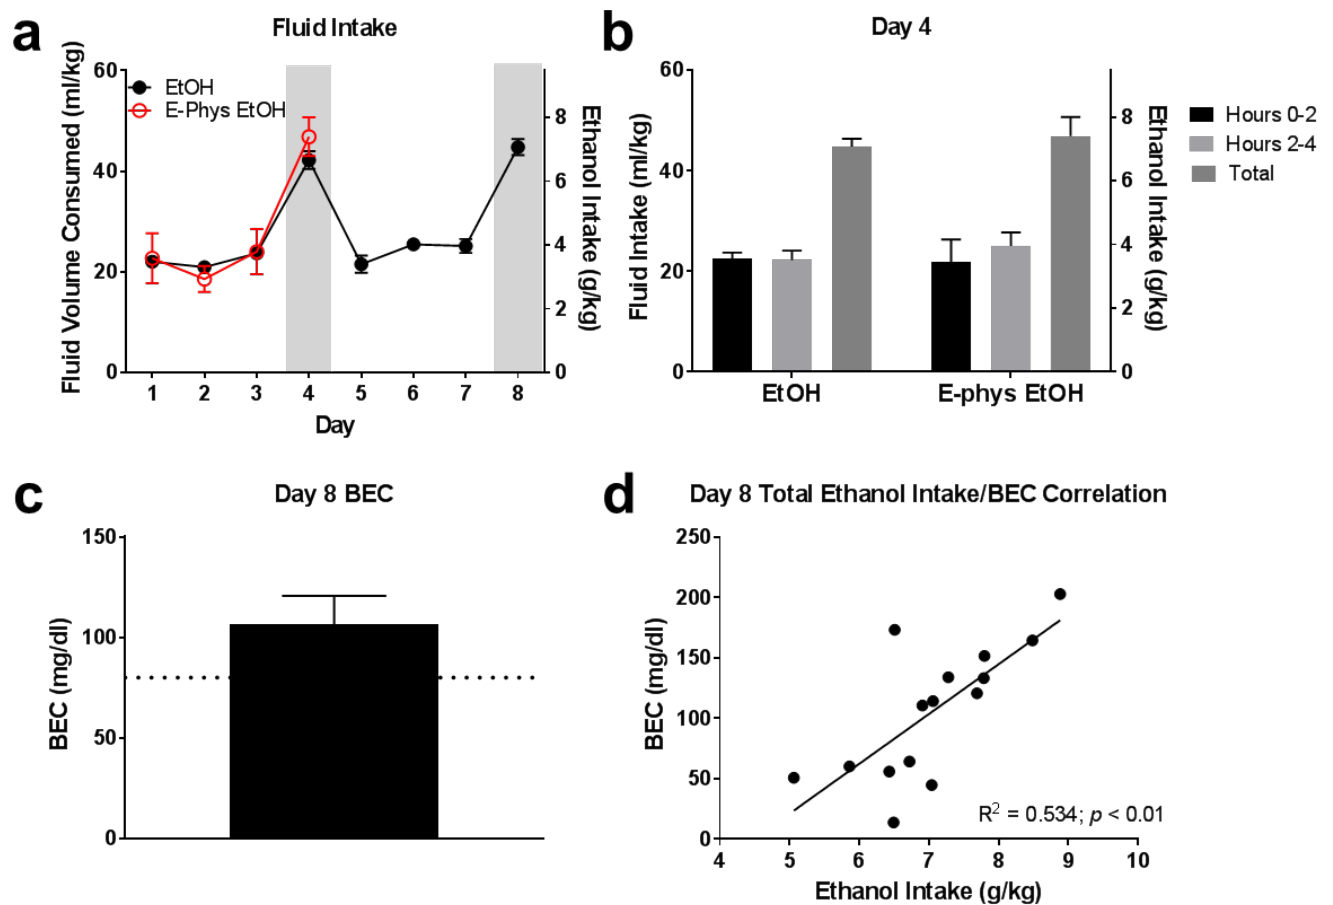

**Supplementary Figure 2. EtOH consumption in the DID paradigm. a)** Consumption of 20% (v/v) EtOH by the additional cohort of mice as well as mice used in electrophysiology experiments during the 2-4 hour drinking sessions in DID. The gray shaded bars represent 4 hr sessions rather than the 2 hr sessions on the other days. **b)** Electrophysiology mice and the parallel cohort demonstrated equivalent EtOH intake during the 4 hr, day 4 DID session. **c)** Average blood ethanol concentration (BEC) of the parallel cohort mice following the day 8 DID session. **d)** EtOH intake on day 8 was significantly predictive of BEC in the parallel cohort of mice ( $R^2 = 0.534$ ,  $P < 0.01$ , linear regression).  $n = 4$  for E-phys EtOH group and 15 for EtOH group. Data represent mean  $\pm$  SEM.

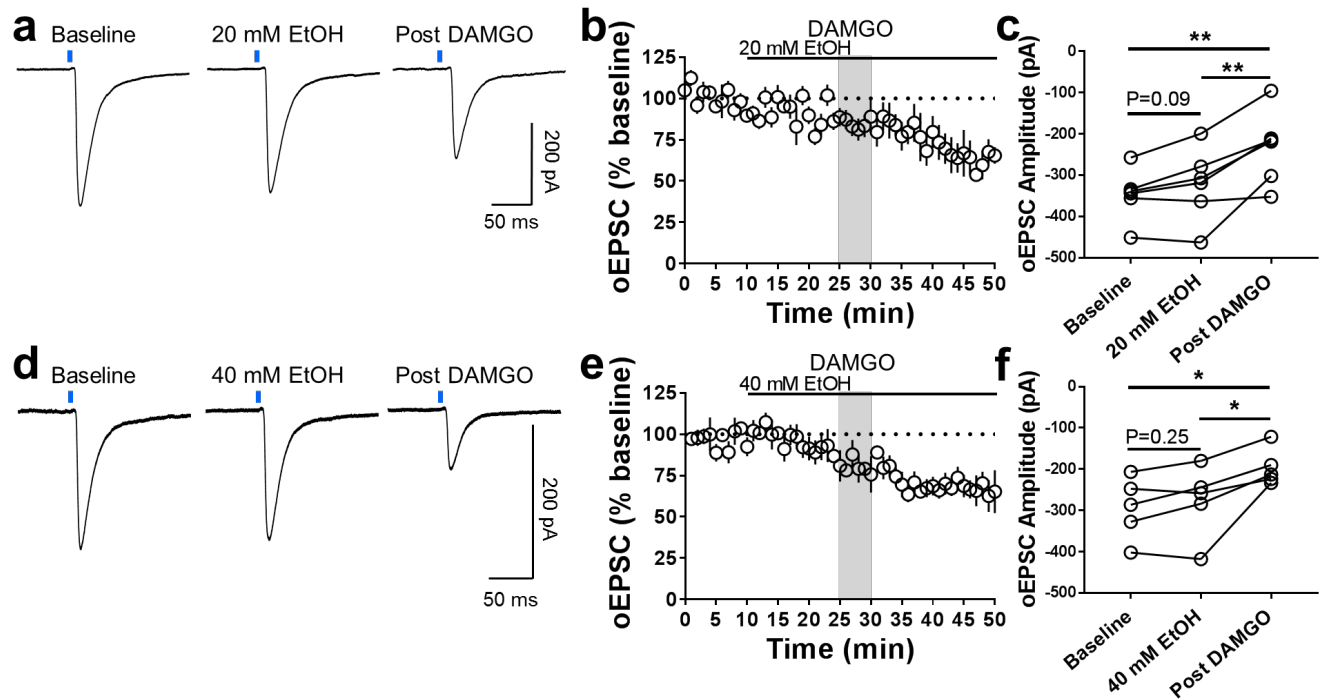

**Supplementary Figure 3. EtOH bath application does not induce or block mOP-LTD.**

**a)** Representative electrically evoked synaptic traces at baseline, during EtOH application (20 mM, 15 min), and after DAMGO application (0.3  $\mu$ M, 5 min) in combination with EtOH. **b-c)** EtOH does not induce glutamatergic synaptic depression and was incapable of preventing mOP-LTD via DAMGO application (Baseline v. EtOH:  $P=0.0935$ ,  $t_5=2.068$ ; Baseline v. DAMGO:  $P=0.0044$ ,  $t_5=4.92$ ; EtOH v. DAMGO:  $P=0.0073$ ,  $t_5=4.364$ ,  $n=6$  from 2 mice). **d)** Representative electrically evoked synaptic traces at baseline, during EtOH application (40 mM, 15 min), and after DAMGO application (0.3  $\mu$ M, 5 min) in combination with EtOH. **e-f)** Similar to the 20 mM concentration, 40 mM EtOH does not induce glutamatergic synaptic depression and was incapable of preventing mOP-LTD via DAMGO application (Baseline v. EtOH:  $P=0.251$ ,  $t_4=1.341$ ; Baseline v. DAMGO:  $P=0.0139$ ,  $t_4=4.183$ ; EtOH v. DAMGO:  $P=0.0388$ ,  $t_4=3.029$ ,  $n=5$  from 2 mice). Data represent mean  $\pm$  SEM. \* $P < 0.05$ , \*\* $P < 0.01$ .

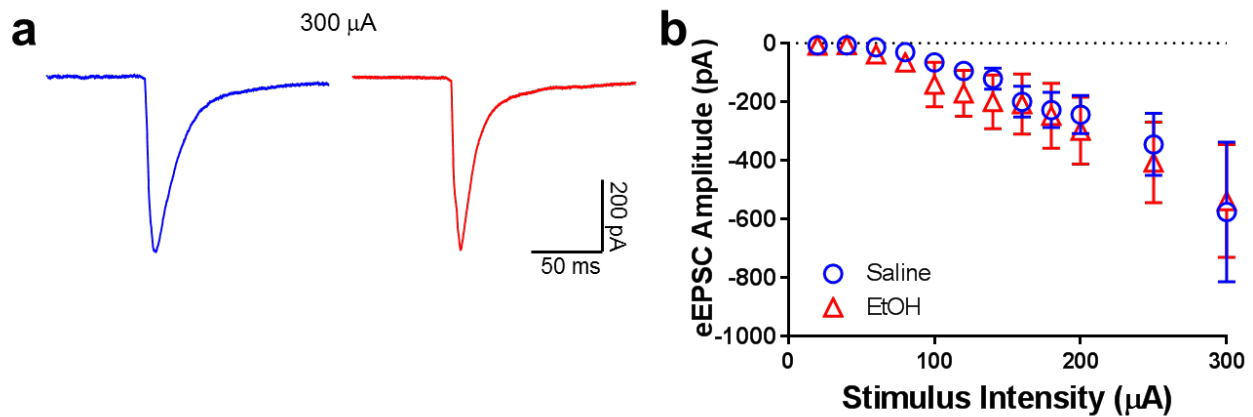

**Supplementary Figure 4. Stimulus-response intensity in DLS MSNs was not affected by *in vivo* EtOH exposure.** **a)** Representative electrically evoked synaptic traces of DLS MSNs from C57BL/6J mice injected with saline (blue circles) or 2.0 g/kg EtOH (red triangles) 24 h earlier. **b)** EtOH does not affect the amplitude of eEPSCs in the DLS (2-way repeated measures ANOVA with Sidak's multiple comparisons test,  $F(1, 11) = 0.154$ ,  $p = 0.7022$ , saline v. EtOH,  $n = 7$  EtOH and  $n = 6$  saline from 1 mouse each). Data represent mean  $\pm$  SEM.

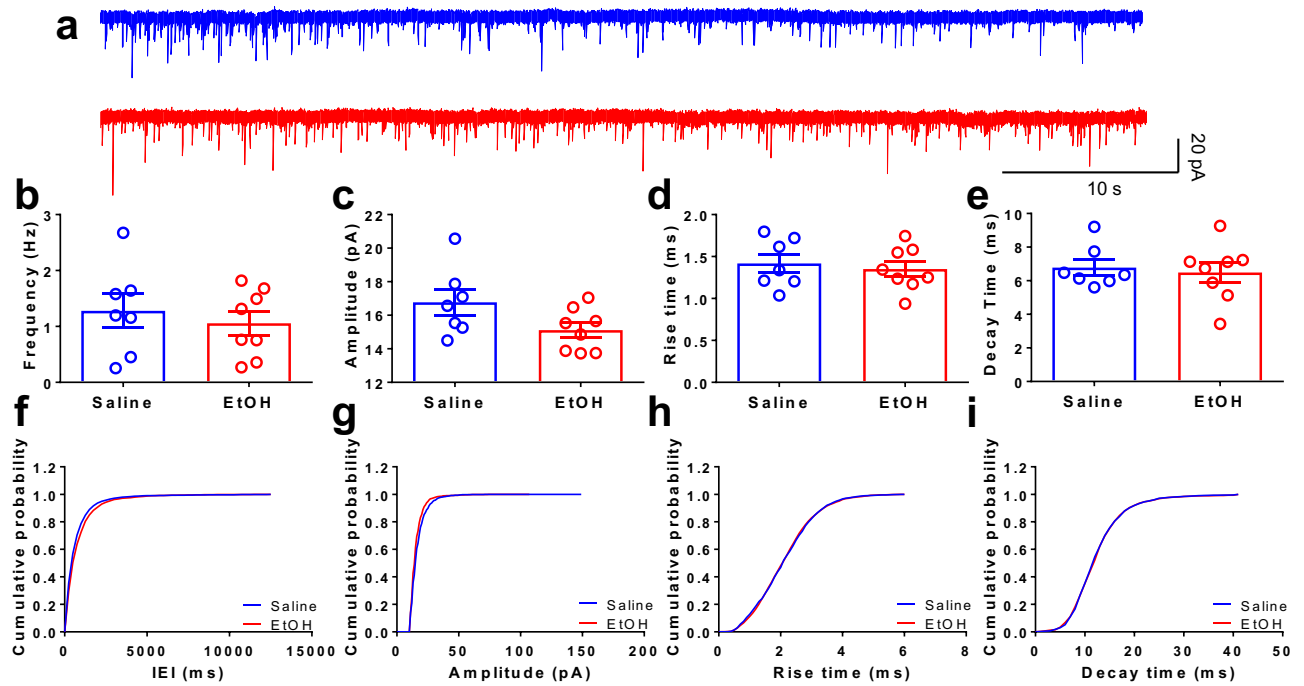

**Supplementary Figure 5. A single *in vivo* EtOH exposure does not affect DLS MSN sEPSCs.** **a)** Representative spontaneous excitatory postsynaptic current (sEPSC) traces of saline (blue) and EtOH (red) injected C57BL/6 mice. **b-i)** EtOH does not affect the frequency ( $P=0.5514$ ,  $t_{13}=0.6115$ ) (**b, f**), amplitude ( $P=0.0774$ ,  $t_{13}=1.918$ ) (**c, g**), rise time ( $P=0.6511$ ,  $t_{13}=0.4629$ ) (**d, h**) or decay time ( $P=0.7155$ ,  $t_{13}=0.3726$ ) (**e, i**) of sEPSCs in the DLS ( $n = 7$  saline and  $n=8$  EtOH from 1 mouse each). Data in **b-e** analyzed with Student's unpaired t-tests. Data represent mean  $\pm$  SEM.

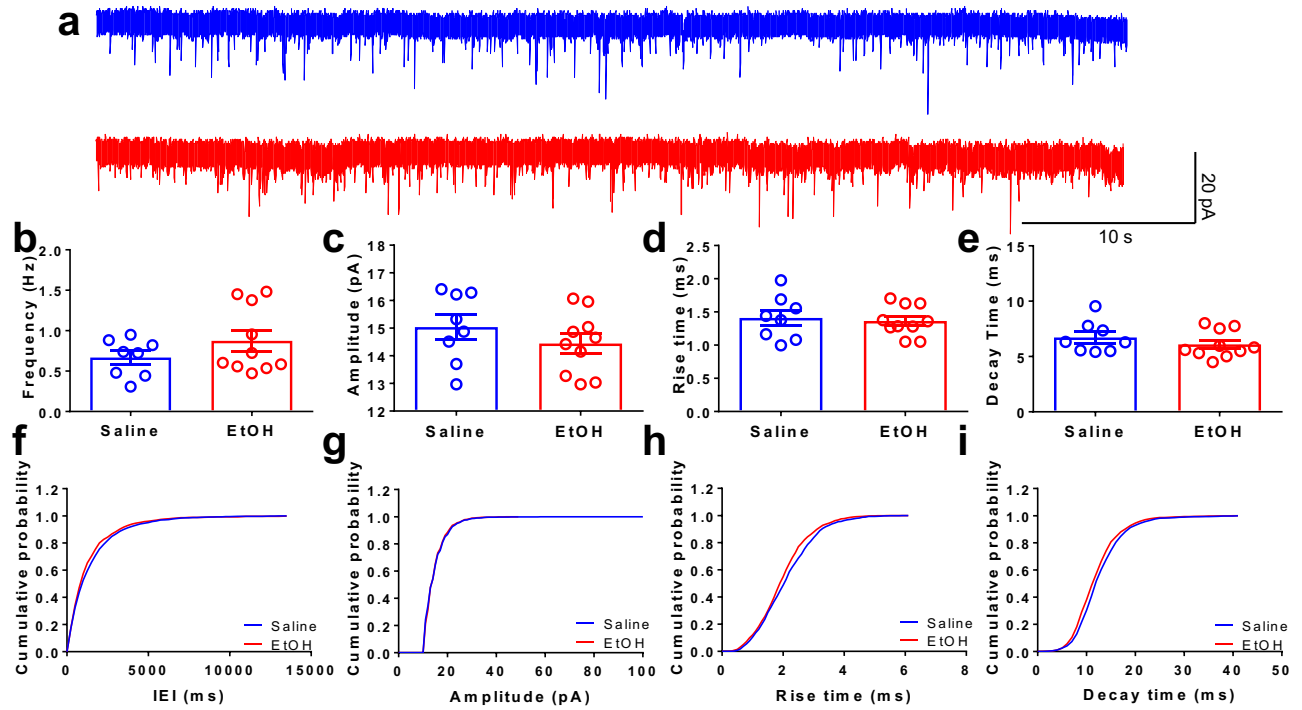

**Supplementary Figure 6. A single *in vivo* EtOH exposure does not affect DLS MSN mEPSCs.** **a**) Representative miniature excitatory postsynaptic current (mEPSC) traces of saline (blue) and EtOH (red) injected C57BL/6 mice obtained with bath inclusion of 0.5 mM TTX. **b-i**) EtOH does not affect the frequency ( $P=0.2238$ ,  $t_{16}=1.266$ ) (**b**, **f**), amplitude ( $P=0.3066$ ,  $t_{16}=1.056$ ) (**c**, **g**), rise time ( $P=0.7299$ ,  $t_{16}=0.3514$ ) (**d**, **h**), or decay time ( $P=0.3378$ ,  $t_{16}=0.9882$ ) (**e**, **i**) of mEPSCs in the DLS ( $n=8$  saline and  $n=10$  EtOH from 1 mouse each). Data in **b-e** analyzed with Student's unpaired t-tests. Data represent mean  $\pm$  SEM.

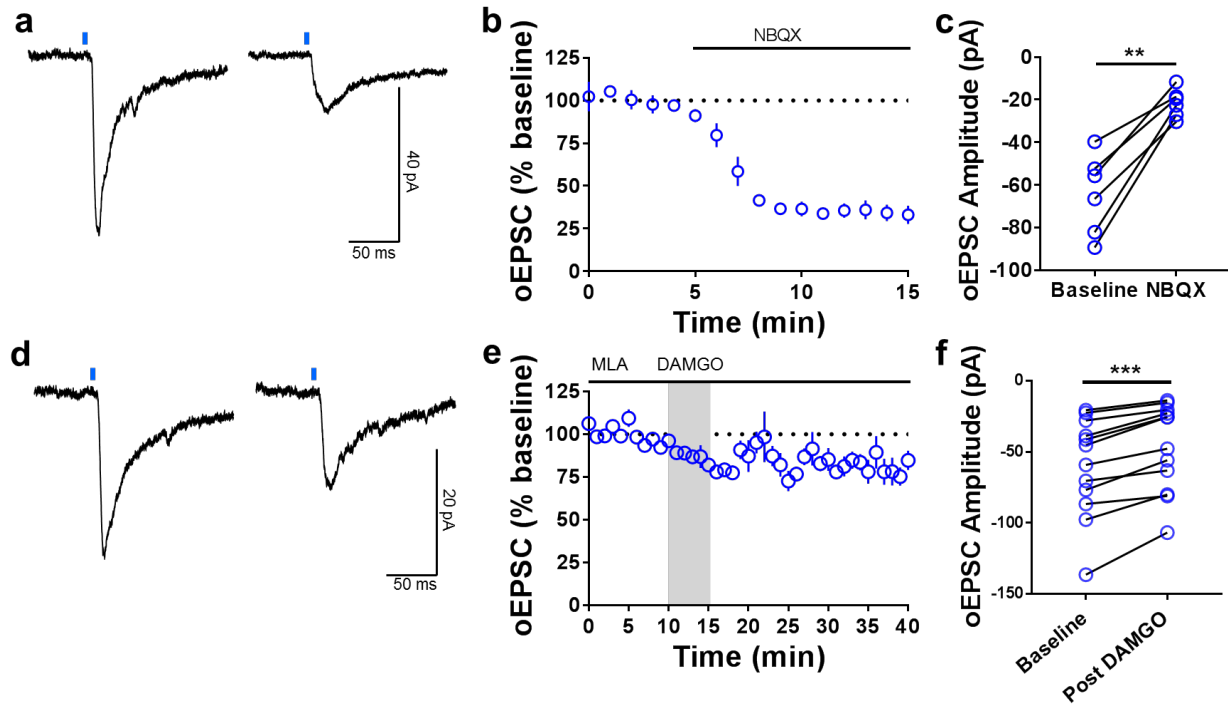

**Supplementary Figure 7. MORs on CINs produce LTD.** **a**) Representative optically evoked synaptic traces at baseline and after NBQX (5  $\mu$ M, 10 min) application. **b-c**) NBQX blocks glutamatergic currents driven by CIN activation (paired t-test,  $P=0.012$ ,  $t_5=6.54$ ,  $n=6$  from 1 mouse). **d**) Representative electrically evoked synaptic traces at baseline and after DAMGO (0.3  $\mu$ M, 5 min) application. **e-f**) The application of MLA (100 nM during entire recording) was incapable of preventing mOP-LTD via DAMGO application (paired t-test,  $P=0.0001$ ,  $t_{11}=6.43$ ,  $n=12$  from 6 mice). Data represent mean  $\pm$  SEM. \*\* $P = 0.01$ , \*\*\* $P < 0.001$ .



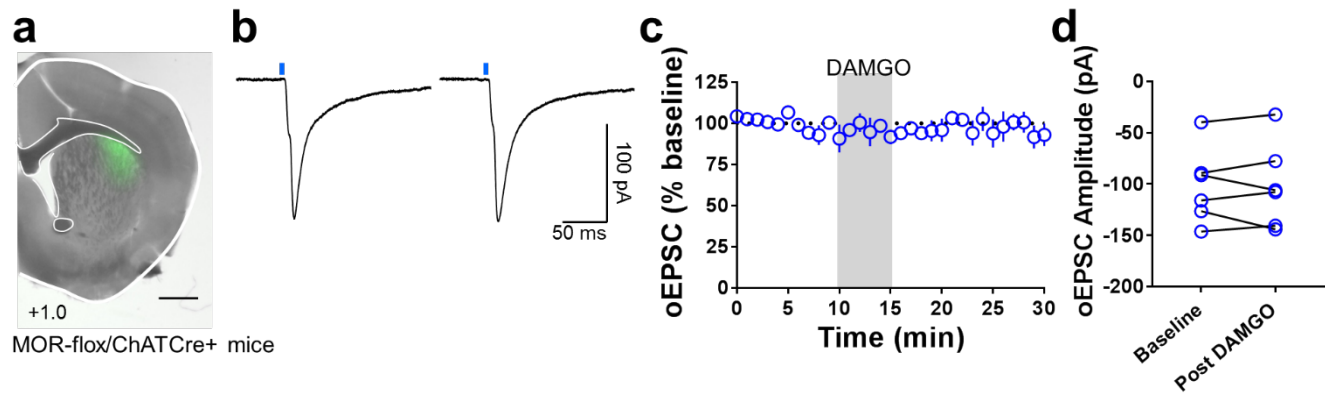

**Supplementary Figure 8. MOR ablation from CINs prevents CIN-mOP-LTD in DLS.**

**a)** An AAV vector coding for ChR2 (AAV9.DIO.ChR2.YFP) was injected into DLS 14 days prior recordings in MOR-flox/ChATCre<sup>+</sup> mice. Coronal brain slice showing the viral infection of CINs in DLS. Bar scale = 1000  $\mu$ m. **b)** Representative electrically evoked synaptic traces at baseline and after DAMGO (0.3  $\mu$ M, 5 min) application. **c-d)** The deletion of MOR from CINs rendered CINs incapable of producing mOP-LTD (paired t-test,  $P=0.988$ ,  $t_5=0.015$ ,  $n=6$  from 2 mice). Data represent mean  $\pm$  SEM.

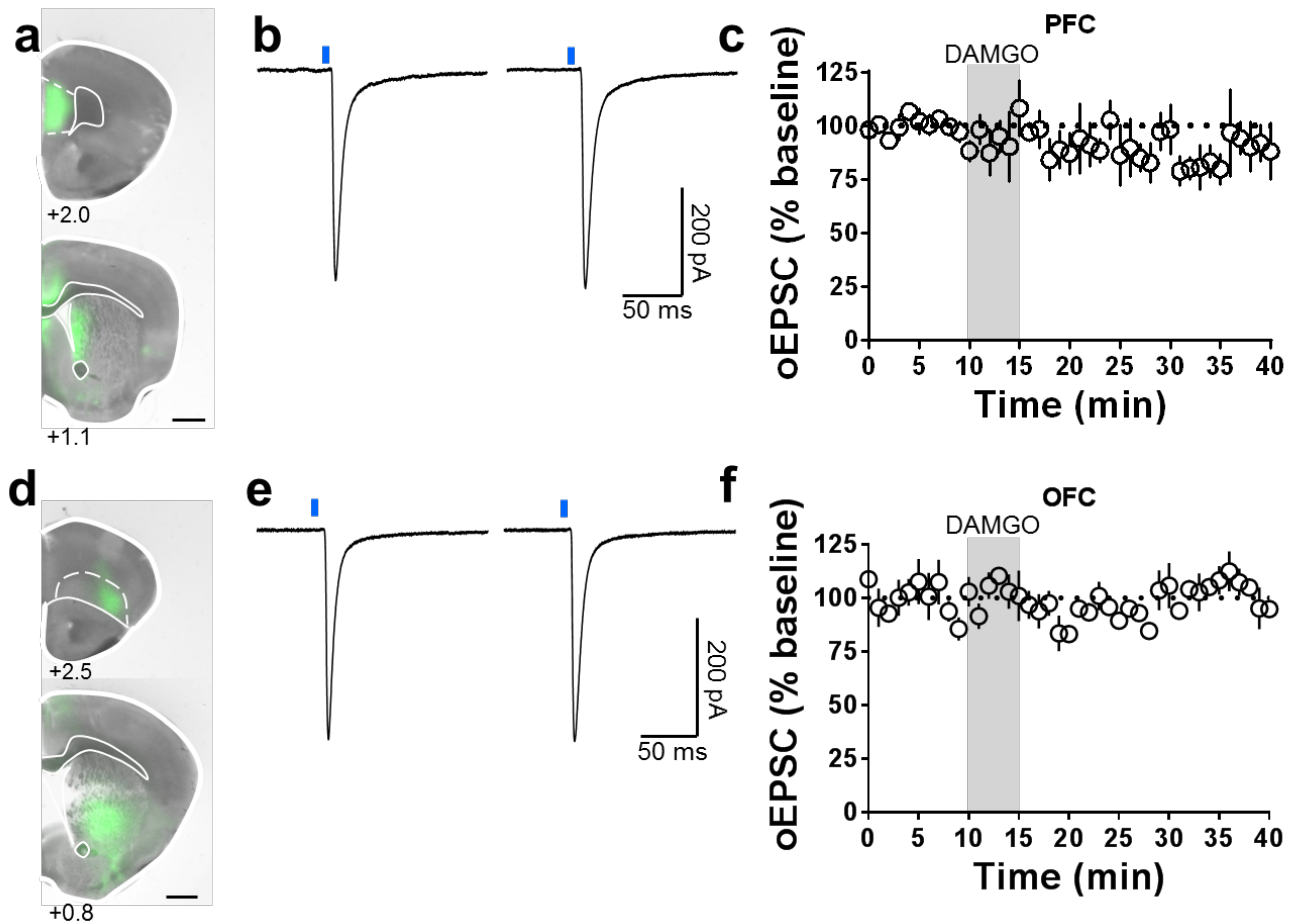

**Supplementary Figure 9. mPFC and OFC are not involved in DLS mOP-LTD.** **a)** An AAV vector coding for ChR2 (AAV.hSyn.ChR2) was injected into mPFC 14 days prior recordings in DLS. Coronal brain slice showing the infection of mPFC projections to striatum. Bar scale=1000  $\mu$ m. **b)** Representative optically evoked synaptic traces recorded in DLS before and after DAMGO (0.3  $\mu$ M, 5 min) application. Despite lower levels of ChR2 expression in DLS following the mPFC injection, oEPSCs were reliably obtained. **c)** No apparent effect of DAMGO was observed during mPFC input stimulation in DLS ( $85.1 \pm 6.5\%$ , paired t-test,  $P=0.145$ ,  $t_3=1.958$ ,  $n=4$  from 2 mice). **d)** Coronal brain slice showing the AAV infection of OFC projections to striatum. Bar scale=1000  $\mu$ m. **e)** Representative optically evoked synaptic traces before and after DAMGO (0.3  $\mu$ M, 5 min) application. **f)** MOR activation did not produce mOP-LTD at OFC terminals in DLS ( $99.6 \pm 4.3\%$ , paired t-test,  $P=0.51$ ,  $t_3=0.754$ ,  $n=4$  from 2 mice). Data represent mean  $\pm$  SEM.

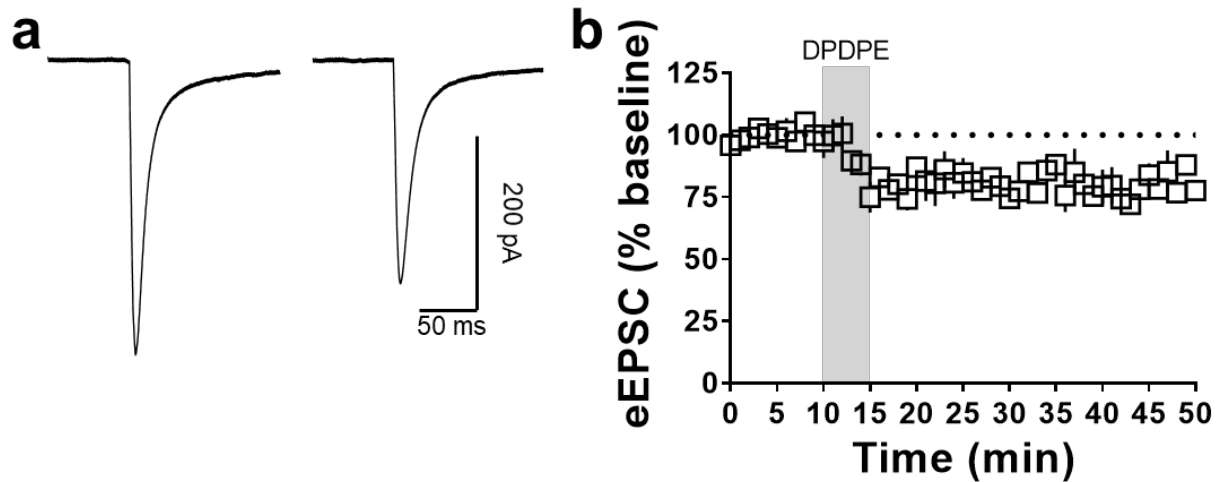

**Supplementary Figure 10. DLS delta OP-LTD was not affected after MOR KO from anterior insular cortex.** **a)** Representative electrically evoked synaptic traces before and after application of the delta opioid receptor (DOR) agonist, DPDPE (0.3  $\mu$ M, 5 min), in MOR-flox mice injected in anterior insular cortex with AAV-cre vector (main text, Fig. 9a). **b)** DOR activation by DPDPE induced delta OP-LTD in the DLS of AAV-cre injected MOR-flox mice ( $80.0 \pm 3.8\%$ , paired t-test,  $P=0.046$ ,  $t_2=4.488$ ,  $n =3$  from 2 mice).
